# Supplementary material for: Orientation of nitro-group governs the fluorescence lifetime of nitrobenzoxadiazole (NBD)-labeled lipids in lipid bilayers
Source: Royal Society of Chemistry journal article supplement (doi:10.1039/c8cp06064a), 2018-11-05
Supplement: c8cp06064a1.pdf [file c8cp06064a1.pdf]

## Supplemental Information for

### **Orientation of nitro-group governs the fluorescence lifetime of nitrobenzoxadiazole (NBD)-labeled lipids in lipid bilayers**

Hugo A. L. Filipe,<sup>†a,b</sup> Šárka Pokorná,<sup>†c</sup> Martin Hof,<sup>c</sup> Mariana Amaro <sup>\*c</sup> and Luís M. S. Loura <sup>\*a,d</sup>

<sup>a</sup> Coimbra Chemistry Center, University of Coimbra, P-3004-535 Coimbra, Portugal

<sup>b</sup> CNC – Center for Neuroscience and Cell Biology, University of Coimbra, P-3004-517 Coimbra, Portugal

<sup>c</sup> Department of Biophysical Chemistry, J. Heyrovský Institute of Physical Chemistry of the Academy of Sciences of the Czech Republic, v.v.i., Dolejškova 3, 182 23 Prague, Czech Republic

<sup>d</sup> Faculty of Pharmacy, University of Coimbra, P-3000-548 Coimbra, Portugal

<sup>†</sup> H.A.L.F. and S.P. contributed equally to this work.

\* Corresponding authors

M.A.: Telephone: +420-266053264; Fax: +420-286582677; E-mail [mariana.amaro@jh-inst.cas.cz](mailto:mariana.amaro@jh-inst.cas.cz)

L.M.S.L.: Telephone: +351-239488485; Fax: +351-239827126; E-mail: [lloura@ff.uc.pt](mailto:lloura@ff.uc.pt)

## Supplementary Information

### Contents

**Table S1:** average lifetimes of C<sub>6</sub>NBD-PC and C<sub>12</sub>NBD-PC in DOPC and POPC LUVs

**Gromacs topology files for probes**

**Description of the Martini parameterization of the NBD fluorophore**

**Fig. S1:** Coarse Grained mapping of the NBD fluorophore

**Fig. S2:** Bond length distributions for the Martini and mapped atomistic parameterization of NBD

**Fig. S3:** Angle distributions for the Martini and mapped atomistic parameterization of NBD

**Fig. S4:** Dihedral distributions for the Martini and mapped atomistic parameterization of NBD

**Fig. S5:** Potential of Mean Force (PMF) profiles for the interaction of NBD-C<sub>4</sub> and NBD-C<sub>8</sub> with a POPC bilayer at atomistic and coarse grained level

**Fig. S6:** Time evolution of the transverse location of individual fluorophores (atomistic simulations)

**Fig. S7:** Time evolution of the transverse location of individual fluorophores (CG simulations)

**Fig. S8:** Calculated POPC *sn*-1 order parameter profiles in the absence and in the presence of C<sub>6</sub>NBD-PC and C<sub>12</sub>NBD-PC

**Fig. S9:** Averaged lifetimes  $\langle\tau\rangle$  obtained for different NBD probes in fluid PC bilayers, as a function of their simulated average number of water-NBD NO<sub>2</sub> H-bonds

**Table S2:** Orientation and H-bonding from MD and fluorescence lifetimes for different NBD lipid probes

Table S1: average lifetimes of C<sub>6</sub>NBD-PC and C<sub>12</sub>NBD-PC in DOPC and POPC LUVs

Average fluorescence lifetime,  $\langle\tau\rangle$ , of C<sub>6</sub>NBD-PC or C<sub>12</sub>NBD-PC in DOPC or POPC LUVs of different diameter, in H<sub>2</sub>O buffer. Error are deviations from at least 3 independent samples.

| $\langle\tau\rangle$ (ns)   | POPC        | DOPC        |
|-----------------------------|-------------|-------------|
| <b>C<sub>6</sub>NBD-PC</b>  | 7.16 ± 0.18 | 6.35 ± 0.13 |
| <b>C<sub>12</sub>NBD-PC</b> | 6.21 ± 0.04 | 5.76 ± 0.05 |

## Topology file for C<sub>6</sub>NBD-PC (Gromos 53a6 force field)

[ moleculetype ]

; Name nrexcl

NBD 3

[ atoms ]

| ; nr | type | resnr | residu | atom | cgnr | charge  | mass    |
|------|------|-------|--------|------|------|---------|---------|
| 1    | CH3L | 1     | NBD    | C1   | 1    | 0.4000  | 15.0350 |
| 2    | CH3L | 1     | NBD    | C2   | 1    | 0.4000  | 15.0350 |
| 3    | CH3L | 1     | NBD    | C3   | 1    | 0.4000  | 15.0350 |
| 4    | NL   | 1     | NBD    | N4   | 1    | -0.5000 | 14.0067 |
| 5    | CH2  | 1     | NBD    | C5   | 1    | 0.3000  | 14.0270 |
| 6    | CH2  | 1     | NBD    | C6   | 2    | 0.4000  | 14.0270 |
| 7    | OA   | 1     | NBD    | O7   | 2    | -0.8000 | 15.9994 |
| 8    | P    | 1     | NBD    | P8   | 2    | 1.7000  | 30.9738 |
| 9    | OML  | 1     | NBD    | O9   | 2    | -0.8000 | 15.9994 |
| 10   | OML  | 1     | NBD    | O10  | 2    | -0.8000 | 15.9994 |
| 11   | OA   | 1     | NBD    | O11  | 2    | -0.7000 | 15.9994 |
| 12   | CH2  | 1     | NBD    | C12  | 3    | 0.4000  | 14.0270 |
| 13   | CH1  | 1     | NBD    | C13  | 3    | 0.3000  | 13.0190 |
| 14   | OE   | 1     | NBD    | O14  | 3    | -0.7000 | 15.9994 |
| 15   | C    | 1     | NBD    | C15  | 3    | 0.7000  | 12.0110 |
| 16   | O    | 1     | NBD    | O16  | 3    | -0.7000 | 15.9994 |
| 17   | CH2  | 1     | NBD    | C17  | 4    | 0.0000  | 14.0270 |
| 18   | CH2  | 1     | NBD    | C18  | 4    | 0.0000  | 14.0270 |
| 19   | CH2  | 1     | NBD    | C19  | 5    | 0.0000  | 14.0270 |
| 20   | CH2  | 1     | NBD    | C20  | 5    | 0.0000  | 14.0270 |
| 21   | CH2  | 1     | NBD    | C21  | 6    | 0.25    | 14.0270 |
| 22   | NE   | 1     | NBD    | N22  | 6    | -0.34   | 14.0067 |
| 23   | C    | 1     | NBD    | C23  | 6    | -0.01   | 12.0110 |
| 24   | CR1  | 1     | NBD    | C24  | 6    | -0.12   | 13.0190 |
| 25   | CR1  | 1     | NBD    | C25  | 6    | 0.19    | 13.0190 |
| 26   | C    | 1     | NBD    | C26  | 6    | -0.37   | 12.0110 |
| 27   | NR   | 1     | NBD    | N27  | 6    | 0.86    | 14.0067 |
| 28   | O    | 1     | NBD    | O28  | 6    | -0.51   | 15.9994 |
| 29   | O    | 1     | NBD    | O29  | 6    | -0.46   | 15.9994 |
| 30   | NR   | 1     | NBD    | N30  | 6    | -0.30   | 14.0067 |
| 31   | C    | 1     | NBD    | C31  | 6    | 0.41    | 12.0110 |
| 32   | C    | 1     | NBD    | C32  | 6    | 0.41    | 12.0110 |
| 33   | OE   | 1     | NBD    | O33  | 6    | 0.02    | 15.9994 |
| 34   | NR   | 1     | NBD    | N34  | 6    | -0.32   | 14.0067 |
| 35   | H    | 1     | NBD    | H35  | 6    | 0.29    | 1.008   |
| 36   | CH2  | 1     | NBD    | C36  | 7    | 0.5000  | 14.0270 |
| 37   | OE   | 1     | NBD    | O37  | 7    | -0.7000 | 15.9994 |
| 38   | C    | 1     | NBD    | C38  | 7    | 0.8000  | 12.0110 |
| 39   | O    | 1     | NBD    | O39  | 7    | -0.6000 | 15.9994 |
| 40   | CH2  | 1     | NBD    | C40  | 8    | 0.0000  | 14.0270 |
| 41   | CH2  | 1     | NBD    | C41  | 8    | 0.0000  | 14.0270 |
| 42   | CH2  | 1     | NBD    | C42  | 9    | 0.0000  | 14.0270 |
| 43   | CH2  | 1     | NBD    | C43  | 9    | 0.0000  | 14.0270 |
| 44   | CH2  | 1     | NBD    | C44  | 10   | 0.0000  | 14.0270 |
| 45   | CH2  | 1     | NBD    | C45  | 10   | 0.0000  | 14.0270 |
| 46   | CH2  | 1     | NBD    | C46  | 11   | 0.0000  | 14.0270 |
| 47   | CH2  | 1     | NBD    | C47  | 11   | 0.0000  | 14.0270 |

|    |     |   |     |     |    |        |         |
|----|-----|---|-----|-----|----|--------|---------|
| 48 | CH2 | 1 | NBD | C48 | 12 | 0.0000 | 14.0270 |
| 49 | CH2 | 1 | NBD | C49 | 12 | 0.0000 | 14.0270 |
| 50 | CH2 | 1 | NBD | C50 | 13 | 0.0000 | 14.0270 |
| 51 | CH2 | 1 | NBD | C51 | 13 | 0.0000 | 14.0270 |
| 52 | CH2 | 1 | NBD | C52 | 14 | 0.0000 | 14.0270 |
| 53 | CH2 | 1 | NBD | C53 | 14 | 0.0000 | 14.0270 |
| 54 | CH3 | 1 | NBD | C54 | 15 | 0.0000 | 15.0350 |

[ bonds ]

| ; ai |  | aj | funct |             |            |
|------|--|----|-------|-------------|------------|
| 1    |  | 4  | 2     | gb_21       |            |
| 2    |  | 4  | 2     | gb_21       |            |
| 3    |  | 4  | 2     | gb_21       |            |
| 4    |  | 5  | 2     | gb_21       |            |
| 5    |  | 6  | 2     | gb_27       |            |
| 6    |  | 7  | 2     | gb_18       |            |
| 7    |  | 8  | 2     | gb_28       |            |
| 8    |  | 9  | 2     | gb_24       |            |
| 8    |  | 10 | 2     | gb_24       |            |
| 8    |  | 11 | 2     | gb_28       |            |
| 11   |  | 12 | 2     | gb_18       |            |
| 12   |  | 13 | 2     | gb_27       |            |
| 13   |  | 14 | 2     | gb_18       |            |
| 13   |  | 36 | 2     | gb_27       |            |
| 14   |  | 15 | 2     | gb_10       |            |
| 15   |  | 16 | 2     | gb_5        |            |
| 15   |  | 17 | 2     | gb_23       |            |
| 17   |  | 18 | 2     | gb_27       |            |
| 18   |  | 19 | 2     | gb_27       |            |
| 19   |  | 20 | 2     | gb_27       |            |
| 20   |  | 21 | 2     | gb_27       |            |
| 22   |  | 23 | 2     | 0.13520E+00 | 1.0500e+07 |
| 22   |  | 35 | 2     | 0.10120E+00 | 1.8700e+07 |
| 23   |  | 24 | 2     | 0.13940E+00 | 1.0800e+07 |
| 23   |  | 32 | 2     | 0.14440E+00 | 1.0800e+07 |
| 24   |  | 25 | 2     | 0.14140E+00 | 1.0800e+07 |
| 25   |  | 26 | 2     | 0.13800E+00 | 1.0800e+07 |
| 26   |  | 27 | 2     | 0.14450E+00 | 8.5400e+06 |
| 26   |  | 31 | 2     | 0.14310E+00 | 1.0800e+07 |
| 27   |  | 28 | 2     | 0.12370E+00 | 1.6600e+07 |
| 27   |  | 29 | 2     | 0.12320E+00 | 1.6600e+07 |
| 30   |  | 31 | 2     | 0.13240E+00 | 1.1800e+07 |
| 30   |  | 33 | 2     | 0.13780E+00 | 1.1000e+07 |
| 31   |  | 32 | 2     | 0.14370E+00 | 1.0800e+07 |
| 32   |  | 34 | 2     | 0.13160E+00 | 1.1800e+07 |
| 33   |  | 34 | 2     | 0.13600E+00 | 1.1000e+07 |
| 21   |  | 22 | 2     | 0.14570E+00 | 8.7100e+06 |
| 36   |  | 37 | 2     | gb_18       |            |
| 37   |  | 38 | 2     | gb_10       |            |
| 38   |  | 39 | 2     | gb_5        |            |
| 38   |  | 40 | 2     | gb_23       |            |
| 40   |  | 41 | 2     | gb_27       |            |
| 41   |  | 42 | 2     | gb_27       |            |
| 42   |  | 43 | 2     | gb_27       |            |
| 43   |  | 44 | 2     | gb_27       |            |
| 44   |  | 45 | 2     | gb_27       |            |

|    |    |   |       |
|----|----|---|-------|
| 45 | 46 | 2 | gb_27 |
| 46 | 47 | 2 | gb_27 |
| 47 | 48 | 2 | gb_27 |
| 48 | 49 | 2 | gb_27 |
| 49 | 50 | 2 | gb_27 |
| 50 | 51 | 2 | gb_27 |
| 51 | 52 | 2 | gb_27 |
| 52 | 53 | 2 | gb_27 |
| 53 | 54 | 2 | gb_27 |

[ pairs ]

| ; | ai | aj | funct |
|---|----|----|-------|
|   | 1  | 6  | 1     |
|   | 2  | 6  | 1     |
|   | 3  | 6  | 1     |
|   | 4  | 7  | 1     |
|   | 5  | 8  | 1     |
|   | 6  | 9  | 1     |
|   | 6  | 10 | 1     |
|   | 6  | 11 | 1     |
|   | 7  | 12 | 1     |
|   | 8  | 13 | 1     |
|   | 9  | 12 | 1     |
|   | 10 | 12 | 1     |
|   | 11 | 14 | 1     |
|   | 11 | 36 | 1     |
|   | 12 | 15 | 1     |
|   | 12 | 37 | 1     |
|   | 13 | 16 | 1     |
|   | 13 | 17 | 1     |
|   | 13 | 38 | 1     |
|   | 14 | 18 | 1     |
|   | 14 | 37 | 1     |
|   | 15 | 19 | 1     |
|   | 15 | 36 | 1     |
|   | 16 | 18 | 1     |
|   | 17 | 20 | 1     |
|   | 18 | 21 | 1     |
|   | 22 | 25 | 1     |
|   | 22 | 34 | 1     |
|   | 22 | 31 | 1     |
|   | 23 | 26 | 1     |
|   | 23 | 30 | 1     |
|   | 23 | 33 | 1     |
|   | 24 | 27 | 1     |
|   | 24 | 31 | 1     |
|   | 24 | 34 | 1     |
|   | 24 | 35 | 1     |
|   | 25 | 28 | 1     |
|   | 25 | 29 | 1     |
|   | 25 | 30 | 1     |
|   | 25 | 32 | 1     |
|   | 26 | 33 | 1     |
|   | 26 | 34 | 1     |
|   | 27 | 30 | 1     |
|   | 27 | 32 | 1     |

|    |    |   |
|----|----|---|
| 28 | 31 | 1 |
| 29 | 31 | 1 |
| 32 | 35 | 1 |
| 19 | 22 | 1 |
| 21 | 24 | 1 |
| 21 | 32 | 1 |
| 20 | 23 | 1 |
| 20 | 35 | 1 |
| 36 | 39 | 1 |
| 36 | 40 | 1 |
| 37 | 41 | 1 |
| 38 | 42 | 1 |
| 39 | 41 | 1 |
| 40 | 43 | 1 |
| 41 | 44 | 1 |
| 42 | 45 | 1 |
| 43 | 46 | 1 |
| 44 | 47 | 1 |
| 45 | 48 | 1 |
| 46 | 49 | 1 |
| 47 | 50 | 1 |
| 48 | 51 | 1 |
| 49 | 52 | 1 |
| 50 | 53 | 1 |
| 51 | 54 | 1 |

```
[ angles ]
; ai      aj      ak funct
    1      4      2      2 ga_13
    1      4      3      2 ga_13
    1      4      5      2 ga_13
    2      4      3      2 ga_13
    2      4      5      2 ga_13
    3      4      5      2 ga_13
    4      5      6      2 ga_15
    5      6      7      2 ga_15
    6      7      8      2 ga_26
    7      8      9      2 ga_14
    7      8      10     2 ga_14
    7      8      11     2 ga_5
    8      11     12     2 ga_26
    9      8      10     2 ga_29
    9      8      11     2 ga_14
   10     8      11     2 ga_14
   11     12     13     2 ga_15
   12     13     14     2 ga_13
   12     13     36     2 ga_13
   13     14     15     2 ga_22
   13     36     37     2 ga_13
   14     13     36     2 ga_13
   14     15     16     2 ga_33
   14     15     17     2 ga_16
   15     17     18     2 ga_15
   16     15     17     2 ga_30
   17     18     19     2 ga_15
   18     19     20     2 ga_15
```

|    |    |    |   |        |        |
|----|----|----|---|--------|--------|
| 19 | 20 | 21 | 2 | ga_15  |        |
| 22 | 23 | 24 | 2 | 125.60 | 750.00 |
| 22 | 23 | 32 | 2 | 119.00 | 750.00 |
| 23 | 22 | 35 | 2 | 117.20 | 390.00 |
| 23 | 24 | 25 | 2 | 121.40 | 560.00 |
| 23 | 32 | 31 | 2 | 123.30 | 560.00 |
| 23 | 32 | 34 | 2 | 127.30 | 560.00 |
| 24 | 23 | 32 | 2 | 115.50 | 560.00 |
| 24 | 25 | 26 | 2 | 123.90 | 560.00 |
| 25 | 26 | 27 | 2 | 120.10 | 560.00 |
| 25 | 26 | 31 | 2 | 117.70 | 560.00 |
| 26 | 27 | 28 | 2 | 118.00 | 750.00 |
| 26 | 27 | 29 | 2 | 117.30 | 750.00 |
| 26 | 31 | 30 | 2 | 133.60 | 560.00 |
| 26 | 31 | 32 | 2 | 118.30 | 560.00 |
| 27 | 26 | 31 | 2 | 122.20 | 560.00 |
| 28 | 27 | 29 | 2 | 124.80 | 750.00 |
| 30 | 31 | 32 | 2 | 108.10 | 465.00 |
| 30 | 33 | 34 | 2 | 113.10 | 450.00 |
| 31 | 30 | 33 | 2 | 104.70 | 465.00 |
| 31 | 32 | 34 | 2 | 109.40 | 465.00 |
| 32 | 34 | 33 | 2 | 104.70 | 465.00 |
| 21 | 22 | 35 | 2 | 118.60 | 460.00 |
| 21 | 22 | 23 | 2 | 124.00 | 730.00 |
| 20 | 21 | 22 | 2 | 111.10 | 530.00 |
| 36 | 37 | 38 | 2 | ga_22  |        |
| 37 | 38 | 39 | 2 | ga_33  |        |
| 37 | 38 | 40 | 2 | ga_16  |        |
| 38 | 40 | 41 | 2 | ga_15  |        |
| 39 | 38 | 40 | 2 | ga_30  |        |
| 40 | 41 | 42 | 2 | ga_15  |        |
| 41 | 42 | 43 | 2 | ga_15  |        |
| 42 | 43 | 44 | 2 | ga_15  |        |
| 43 | 44 | 45 | 2 | ga_15  |        |
| 44 | 45 | 46 | 2 | ga_15  |        |
| 45 | 46 | 47 | 2 | ga_15  |        |
| 46 | 47 | 48 | 2 | ga_15  |        |
| 47 | 48 | 49 | 2 | ga_15  |        |
| 48 | 49 | 50 | 2 | ga_15  |        |
| 49 | 50 | 51 | 2 | ga_15  |        |
| 50 | 51 | 52 | 2 | ga_15  |        |
| 51 | 52 | 53 | 2 | ga_15  |        |
| 52 | 53 | 54 | 2 | ga_15  |        |

[ dihedrals ]

| ; | ai | aj | ak | al | funct | phi0  | cp | mult |
|---|----|----|----|----|-------|-------|----|------|
|   | 1  | 4  | 5  | 6  | 1     | gd_29 |    |      |
|   | 4  | 5  | 6  | 7  | 1     | gd_4  |    |      |
|   | 4  | 5  | 6  | 7  | 1     | gd_36 |    |      |
|   | 5  | 6  | 7  | 8  | 1     | gd_29 |    |      |
|   | 6  | 7  | 8  | 11 | 1     | gd_20 |    |      |
|   | 6  | 7  | 8  | 11 | 1     | gd_27 |    |      |
|   | 7  | 8  | 11 | 12 | 1     | gd_20 |    |      |
|   | 7  | 8  | 11 | 12 | 1     | gd_27 |    |      |
|   | 8  | 11 | 12 | 13 | 1     | gd_29 |    |      |
|   | 11 | 12 | 13 | 36 | 1     | gd_34 |    |      |



|    |    |    |    |   |       |       |   |  |
|----|----|----|----|---|-------|-------|---|--|
| 12 | 13 | 14 | 15 | 1 | gd_29 |       |   |  |
| 12 | 13 | 36 | 37 | 1 | gd_34 |       |   |  |
| 13 | 14 | 15 | 17 | 1 | gd_13 |       |   |  |
| 13 | 36 | 37 | 38 | 1 | gd_29 |       |   |  |
| 14 | 15 | 17 | 18 | 1 | gd_40 |       |   |  |
| 15 | 17 | 18 | 19 | 1 | gd_34 |       |   |  |
| 17 | 18 | 19 | 20 | 1 | gd_34 |       |   |  |
| 18 | 19 | 20 | 21 | 1 | gd_34 |       |   |  |
| 19 | 20 | 21 | 22 | 1 | gd_34 |       |   |  |
| 20 | 21 | 22 | 35 | 1 | gd_41 |       |   |  |
| 21 | 22 | 23 | 24 | 1 | 0.0   | 33.50 | 2 |  |
| 31 | 26 | 27 | 29 | 1 | 0.0   | 33.50 | 2 |  |
| 36 | 37 | 38 | 40 | 1 | gd_13 |       |   |  |
| 37 | 38 | 40 | 41 | 1 | gd_40 |       |   |  |
| 38 | 40 | 41 | 42 | 1 | gd_34 |       |   |  |
| 40 | 41 | 42 | 43 | 1 | gd_34 |       |   |  |
| 41 | 42 | 43 | 44 | 1 | gd_34 |       |   |  |
| 42 | 43 | 44 | 45 | 1 | gd_34 |       |   |  |
| 43 | 44 | 45 | 46 | 1 | gd_34 |       |   |  |
| 44 | 45 | 46 | 47 | 1 | gd_34 |       |   |  |
| 45 | 46 | 47 | 48 | 1 | gd_34 |       |   |  |
| 46 | 47 | 48 | 49 | 1 | gd_34 |       |   |  |
| 47 | 48 | 49 | 50 | 1 | gd_34 |       |   |  |
| 48 | 49 | 50 | 51 | 1 | gd_34 |       |   |  |
| 49 | 50 | 51 | 52 | 1 | gd_34 |       |   |  |
| 50 | 51 | 52 | 53 | 1 | gd_34 |       |   |  |
| 51 | 52 | 53 | 54 | 1 | gd_34 |       |   |  |

[ dihedrals ]

| ; | ai | aj | ak | al | funct |             |             |  |
|---|----|----|----|----|-------|-------------|-------------|--|
|   | 13 | 14 | 36 | 12 | 2     | gi_2        |             |  |
|   | 15 | 14 | 16 | 17 | 2     | gi_1        |             |  |
|   | 38 | 37 | 39 | 40 | 2     | gi_1        |             |  |
|   | 22 | 21 | 35 | 23 | 2     | 0.00000E+00 | 0.16740E+03 |  |
|   | 23 | 22 | 32 | 24 | 2     | 0.00000E+00 | 0.16740E+03 |  |
|   | 32 | 23 | 31 | 34 | 2     | 0.00000E+00 | 0.16740E+03 |  |
|   | 31 | 32 | 26 | 30 | 2     | 0.00000E+00 | 0.16740E+03 |  |
|   | 26 | 31 | 27 | 25 | 2     | 0.00000E+00 | 0.16740E+03 |  |
|   | 27 | 26 | 29 | 28 | 2     | 0.00000E+00 | 0.16740E+03 |  |
|   | 32 | 34 | 33 | 30 | 2     | 0.00000E+00 | 0.16740E+03 |  |
|   | 34 | 33 | 30 | 31 | 2     | 0.00000E+00 | 0.16740E+03 |  |
|   | 33 | 30 | 31 | 32 | 2     | 0.00000E+00 | 0.16740E+03 |  |
|   | 30 | 31 | 32 | 34 | 2     | 0.00000E+00 | 0.16740E+03 |  |
|   | 31 | 32 | 34 | 33 | 2     | 0.00000E+00 | 0.16740E+03 |  |
|   | 23 | 32 | 31 | 26 | 2     | 0.00000E+00 | 0.16740E+03 |  |
|   | 32 | 31 | 26 | 25 | 2     | 0.00000E+00 | 0.16740E+03 |  |
|   | 31 | 26 | 25 | 24 | 2     | 0.00000E+00 | 0.16740E+03 |  |
|   | 26 | 25 | 24 | 23 | 2     | 0.00000E+00 | 0.16740E+03 |  |
|   | 25 | 24 | 23 | 32 | 2     | 0.00000E+00 | 0.16740E+03 |  |
|   | 24 | 23 | 32 | 31 | 2     | 0.00000E+00 | 0.16740E+03 |  |
|   | 29 | 27 | 26 | 31 | 2     | 0.00000E+00 | 0.16740E+03 |  |
|   | 25 | 26 | 27 | 28 | 2     | 0.00000E+00 | 0.16740E+03 |  |

Topology file for C<sub>12</sub>NBD-PC (Gromos 53a6 force field)

[ moleculetype ]

; Name nrexcl

NBD 3

[ atoms ]

| ; nr | type | resnr | residu | atom | cgnr | charge  | mass    |
|------|------|-------|--------|------|------|---------|---------|
| 1    | CH3L | 1     | NBD    | C1   | 1    | 0.4000  | 15.0350 |
| 2    | CH3L | 1     | NBD    | C2   | 1    | 0.4000  | 15.0350 |
| 3    | CH3L | 1     | NBD    | C3   | 1    | 0.4000  | 15.0350 |
| 4    | NL   | 1     | NBD    | N4   | 1    | -0.5000 | 14.0067 |
| 5    | CH2  | 1     | NBD    | C5   | 1    | 0.3000  | 14.0270 |
| 6    | CH2  | 1     | NBD    | C6   | 2    | 0.4000  | 14.0270 |
| 7    | OA   | 1     | NBD    | O7   | 2    | -0.8000 | 15.9994 |
| 8    | P    | 1     | NBD    | P8   | 2    | 1.7000  | 30.9738 |
| 9    | OML  | 1     | NBD    | O9   | 2    | -0.8000 | 15.9994 |
| 10   | OML  | 1     | NBD    | O10  | 2    | -0.8000 | 15.9994 |
| 11   | OA   | 1     | NBD    | O11  | 2    | -0.7000 | 15.9994 |
| 12   | CH2  | 1     | NBD    | C12  | 3    | 0.4000  | 14.0270 |
| 13   | CH1  | 1     | NBD    | C13  | 3    | 0.3000  | 13.0190 |
| 14   | OE   | 1     | NBD    | O14  | 3    | -0.7000 | 15.9994 |
| 15   | C    | 1     | NBD    | C15  | 3    | 0.7000  | 12.0110 |
| 16   | O    | 1     | NBD    | O16  | 3    | -0.7000 | 15.9994 |
| 17   | CH2  | 1     | NBD    | C17  | 4    | 0.0000  | 14.0270 |
| 18   | CH2  | 1     | NBD    | C18  | 4    | 0.0000  | 14.0270 |
| 19   | CH2  | 1     | NBD    | C19  | 5    | 0.0000  | 14.0270 |
| 20   | CH2  | 1     | NBD    | C20  | 5    | 0.0000  | 14.0270 |
| 21   | CH2  | 1     | NBD    | C21  | 6    | 0.0000  | 14.0270 |
| 22   | CH2  | 1     | NBD    | C22  | 6    | 0.0000  | 14.0270 |
| 23   | CH2  | 1     | NBD    | C23  | 7    | 0.0000  | 14.0270 |
| 24   | CH2  | 1     | NBD    | C24  | 7    | 0.0000  | 14.0270 |
| 25   | CH2  | 1     | NBD    | C25  | 8    | 0.0000  | 14.0270 |
| 26   | CH2  | 1     | NBD    | C26  | 8    | 0.0000  | 14.0270 |
| 27   | CH2  | 1     | NBD    | C27  | 9    | 0.25    | 14.0270 |
| 28   | NE   | 1     | NBD    | N28  | 9    | -0.34   | 14.0067 |
| 29   | C    | 1     | NBD    | C29  | 9    | -0.01   | 12.0110 |
| 30   | CR1  | 1     | NBD    | C30  | 9    | -0.12   | 13.0190 |
| 31   | CR1  | 1     | NBD    | C31  | 9    | 0.19    | 13.0190 |
| 32   | C    | 1     | NBD    | C32  | 9    | -0.37   | 12.0110 |
| 33   | NR   | 1     | NBD    | N33  | 9    | 0.86    | 14.0067 |
| 34   | O    | 1     | NBD    | O34  | 9    | -0.51   | 15.9994 |
| 35   | O    | 1     | NBD    | O35  | 9    | -0.46   | 15.9994 |
| 36   | NR   | 1     | NBD    | N36  | 9    | -0.30   | 14.0067 |
| 37   | C    | 1     | NBD    | C37  | 9    | 0.41    | 12.0110 |
| 38   | C    | 1     | NBD    | C38  | 9    | 0.41    | 12.0110 |
| 39   | OE   | 1     | NBD    | O39  | 9    | 0.02    | 15.9994 |
| 40   | NR   | 1     | NBD    | N40  | 9    | -0.32   | 14.0067 |
| 41   | H    | 1     | NBD    | H41  | 9    | 0.29    | 1.008   |
| 42   | CH2  | 1     | NBD    | C42  | 10   | 0.5000  | 14.0270 |
| 43   | OE   | 1     | NBD    | O43  | 10   | -0.7000 | 15.9994 |
| 44   | C    | 1     | NBD    | C44  | 10   | 0.8000  | 12.0110 |
| 45   | O    | 1     | NBD    | O45  | 10   | -0.6000 | 15.9994 |
| 46   | CH2  | 1     | NBD    | C46  | 11   | 0.0000  | 14.0270 |
| 47   | CH2  | 1     | NBD    | C47  | 11   | 0.0000  | 14.0270 |

|    |     |   |     |     |    |        |         |
|----|-----|---|-----|-----|----|--------|---------|
| 48 | CH2 | 1 | NBD | C48 | 12 | 0.0000 | 14.0270 |
| 49 | CH2 | 1 | NBD | C49 | 12 | 0.0000 | 14.0270 |
| 50 | CH2 | 1 | NBD | C50 | 13 | 0.0000 | 14.0270 |
| 51 | CH2 | 1 | NBD | C51 | 13 | 0.0000 | 14.0270 |
| 52 | CH2 | 1 | NBD | C52 | 14 | 0.0000 | 14.0270 |
| 53 | CH2 | 1 | NBD | C53 | 14 | 0.0000 | 14.0270 |
| 54 | CH2 | 1 | NBD | C54 | 15 | 0.0000 | 14.0270 |
| 55 | CH2 | 1 | NBD | C55 | 15 | 0.0000 | 14.0270 |
| 56 | CH2 | 1 | NBD | C56 | 16 | 0.0000 | 14.0270 |
| 57 | CH2 | 1 | NBD | C57 | 16 | 0.0000 | 14.0270 |
| 58 | CH2 | 1 | NBD | C58 | 17 | 0.0000 | 14.0270 |
| 59 | CH2 | 1 | NBD | C59 | 17 | 0.0000 | 14.0270 |
| 60 | CH3 | 1 | NBD | C60 | 18 | 0.0000 | 15.0350 |

[ bonds ]

```

; ai aj funct
1 4 2 gb_21
2 4 2 gb_21
3 4 2 gb_21
4 5 2 gb_21
5 6 2 gb_27
6 7 2 gb_18
7 8 2 gb_28
8 9 2 gb_24
8 10 2 gb_24
8 11 2 gb_28
11 12 2 gb_18
12 13 2 gb_27
13 14 2 gb_18
13 42 2 gb_27
14 15 2 gb_10
15 16 2 gb_5
15 17 2 gb_23
17 18 2 gb_27
18 19 2 gb_27
19 20 2 gb_27
20 21 2 gb_27
21 22 2 gb_27
22 23 2 gb_27
23 24 2 gb_27
24 25 2 gb_27
25 26 2 gb_27
26 27 2 gb_27
28 29 2 0.13520E+00 1.0500e+07
28 41 2 0.10120E+00 1.8700e+07
29 30 2 0.13940E+00 1.0800e+07
29 38 2 0.14440E+00 1.0800e+07
30 31 2 0.14140E+00 1.0800e+07
31 32 2 0.13800E+00 1.0800e+07
32 33 2 0.14450E+00 8.5400e+06
32 37 2 0.14310E+00 1.0800e+07
33 34 2 0.12370E+00 1.6600e+07
33 35 2 0.12320E+00 1.6600e+07
36 37 2 0.13240E+00 1.1800e+07
36 39 2 0.13780E+00 1.1000e+07
37 38 2 0.14370E+00 1.0800e+07

```

|    |    |   |             |            |
|----|----|---|-------------|------------|
| 38 | 40 | 2 | 0.13160E+00 | 1.1800e+07 |
| 39 | 40 | 2 | 0.13600E+00 | 1.1000e+07 |
| 27 | 28 | 2 | 0.14570E+00 | 8.7100e+06 |
| 42 | 43 | 2 | gb_18       |            |
| 43 | 44 | 2 | gb_10       |            |
| 44 | 45 | 2 | gb_5        |            |
| 44 | 46 | 2 | gb_23       |            |
| 46 | 47 | 2 | gb_27       |            |
| 47 | 48 | 2 | gb_27       |            |
| 48 | 49 | 2 | gb_27       |            |
| 49 | 50 | 2 | gb_27       |            |
| 50 | 51 | 2 | gb_27       |            |
| 51 | 52 | 2 | gb_27       |            |
| 52 | 53 | 2 | gb_27       |            |
| 53 | 54 | 2 | gb_27       |            |
| 54 | 55 | 2 | gb_27       |            |
| 55 | 56 | 2 | gb_27       |            |
| 56 | 57 | 2 | gb_27       |            |
| 57 | 58 | 2 | gb_27       |            |
| 58 | 59 | 2 | gb_27       |            |
| 59 | 60 | 2 | gb_27       |            |

[ pairs ]

| ; | ai | aj | funct |
|---|----|----|-------|
|   | 1  | 6  | 1     |
|   | 2  | 6  | 1     |
|   | 3  | 6  | 1     |
|   | 4  | 7  | 1     |
|   | 5  | 8  | 1     |
|   | 6  | 9  | 1     |
|   | 6  | 10 | 1     |
|   | 6  | 11 | 1     |
|   | 7  | 12 | 1     |
|   | 8  | 13 | 1     |
|   | 9  | 12 | 1     |
|   | 10 | 12 | 1     |
|   | 11 | 14 | 1     |
|   | 11 | 42 | 1     |
|   | 12 | 15 | 1     |
|   | 12 | 43 | 1     |
|   | 13 | 16 | 1     |
|   | 13 | 17 | 1     |
|   | 13 | 44 | 1     |
|   | 14 | 18 | 1     |
|   | 14 | 43 | 1     |
|   | 15 | 19 | 1     |
|   | 15 | 42 | 1     |
|   | 16 | 18 | 1     |
|   | 17 | 20 | 1     |
|   | 18 | 21 | 1     |
|   | 19 | 22 | 1     |
|   | 20 | 23 | 1     |
|   | 21 | 24 | 1     |
|   | 22 | 25 | 1     |
|   | 23 | 26 | 1     |
|   | 24 | 27 | 1     |

|    |    |   |
|----|----|---|
| 28 | 31 | 1 |
| 28 | 40 | 1 |
| 28 | 37 | 1 |
| 29 | 32 | 1 |
| 29 | 36 | 1 |
| 29 | 39 | 1 |
| 30 | 33 | 1 |
| 30 | 37 | 1 |
| 30 | 40 | 1 |
| 30 | 41 | 1 |
| 31 | 34 | 1 |
| 31 | 35 | 1 |
| 31 | 36 | 1 |
| 31 | 38 | 1 |
| 32 | 39 | 1 |
| 32 | 40 | 1 |
| 33 | 36 | 1 |
| 33 | 38 | 1 |
| 34 | 37 | 1 |
| 35 | 37 | 1 |
| 38 | 41 | 1 |
| 25 | 28 | 1 |
| 27 | 30 | 1 |
| 27 | 38 | 1 |
| 26 | 29 | 1 |
| 26 | 41 | 1 |
| 42 | 45 | 1 |
| 42 | 46 | 1 |
| 43 | 47 | 1 |
| 44 | 48 | 1 |
| 45 | 47 | 1 |
| 46 | 49 | 1 |
| 47 | 50 | 1 |
| 48 | 51 | 1 |
| 49 | 52 | 1 |
| 50 | 53 | 1 |
| 51 | 54 | 1 |
| 52 | 55 | 1 |
| 53 | 56 | 1 |
| 54 | 57 | 1 |
| 55 | 58 | 1 |
| 56 | 59 | 1 |
| 57 | 60 | 1 |

```
[ angles ]
; ai    aj    ak funct
      1     4     2     2 ga_13
      1     4     3     2 ga_13
      1     4     5     2 ga_13
      2     4     3     2 ga_13
      2     4     5     2 ga_13
      3     4     5     2 ga_13
      4     5     6     2 ga_15
      5     6     7     2 ga_15
      6     7     8     2 ga_26
      7     8     9     2 ga_14
```

|    |    |    |   |        |        |
|----|----|----|---|--------|--------|
| 7  | 8  | 10 | 2 | ga_14  |        |
| 7  | 8  | 11 | 2 | ga_5   |        |
| 8  | 11 | 12 | 2 | ga_26  |        |
| 9  | 8  | 10 | 2 | ga_29  |        |
| 9  | 8  | 11 | 2 | ga_14  |        |
| 10 | 8  | 11 | 2 | ga_14  |        |
| 11 | 12 | 13 | 2 | ga_15  |        |
| 12 | 13 | 14 | 2 | ga_13  |        |
| 12 | 13 | 42 | 2 | ga_13  |        |
| 13 | 14 | 15 | 2 | ga_22  |        |
| 13 | 42 | 43 | 2 | ga_13  |        |
| 14 | 13 | 42 | 2 | ga_13  |        |
| 14 | 15 | 16 | 2 | ga_33  |        |
| 14 | 15 | 17 | 2 | ga_16  |        |
| 15 | 17 | 18 | 2 | ga_15  |        |
| 16 | 15 | 17 | 2 | ga_30  |        |
| 17 | 18 | 19 | 2 | ga_15  |        |
| 18 | 19 | 20 | 2 | ga_15  |        |
| 19 | 20 | 21 | 2 | ga_15  |        |
| 20 | 21 | 22 | 2 | ga_15  |        |
| 21 | 22 | 23 | 2 | ga_15  |        |
| 22 | 23 | 24 | 2 | ga_15  |        |
| 23 | 24 | 25 | 2 | ga_15  |        |
| 24 | 25 | 26 | 2 | ga_15  |        |
| 25 | 26 | 27 | 2 | ga_15  |        |
| 28 | 29 | 30 | 2 | 125.60 | 750.00 |
| 28 | 29 | 38 | 2 | 119.00 | 750.00 |
| 29 | 28 | 41 | 2 | 117.20 | 390.00 |
| 29 | 30 | 31 | 2 | 121.40 | 560.00 |
| 29 | 38 | 37 | 2 | 123.30 | 560.00 |
| 29 | 38 | 40 | 2 | 127.30 | 560.00 |
| 30 | 29 | 38 | 2 | 115.50 | 560.00 |
| 30 | 31 | 32 | 2 | 123.90 | 560.00 |
| 31 | 32 | 33 | 2 | 120.10 | 560.00 |
| 31 | 32 | 37 | 2 | 117.70 | 560.00 |
| 32 | 33 | 34 | 2 | 118.00 | 750.00 |
| 32 | 33 | 35 | 2 | 117.30 | 750.00 |
| 32 | 37 | 36 | 2 | 133.60 | 560.00 |
| 32 | 37 | 38 | 2 | 118.30 | 560.00 |
| 33 | 32 | 37 | 2 | 122.20 | 560.00 |
| 34 | 33 | 35 | 2 | 124.80 | 750.00 |
| 36 | 37 | 38 | 2 | 108.10 | 465.00 |
| 36 | 39 | 40 | 2 | 113.10 | 450.00 |
| 37 | 36 | 39 | 2 | 104.70 | 465.00 |
| 37 | 38 | 40 | 2 | 109.40 | 465.00 |
| 38 | 40 | 39 | 2 | 104.70 | 465.00 |
| 27 | 28 | 41 | 2 | 118.60 | 460.00 |
| 27 | 28 | 29 | 2 | 124.00 | 730.00 |
| 26 | 27 | 28 | 2 | 111.10 | 530.00 |
| 42 | 43 | 44 | 2 | ga_22  |        |
| 43 | 44 | 45 | 2 | ga_33  |        |
| 43 | 44 | 46 | 2 | ga_16  |        |
| 44 | 46 | 47 | 2 | ga_15  |        |
| 45 | 44 | 46 | 2 | ga_30  |        |
| 46 | 47 | 48 | 2 | ga_15  |        |
| 47 | 48 | 49 | 2 | ga_15  |        |

|    |    |    |   |       |
|----|----|----|---|-------|
| 48 | 49 | 50 | 2 | ga_15 |
| 49 | 50 | 51 | 2 | ga_15 |
| 50 | 51 | 52 | 2 | ga_15 |
| 51 | 52 | 53 | 2 | ga_15 |
| 52 | 53 | 54 | 2 | ga_15 |
| 53 | 54 | 55 | 2 | ga_15 |
| 54 | 55 | 56 | 2 | ga_15 |
| 55 | 56 | 57 | 2 | ga_15 |
| 56 | 57 | 58 | 2 | ga_15 |
| 57 | 58 | 59 | 2 | ga_15 |
| 58 | 59 | 60 | 2 | ga_15 |

[ dihedrals ]

| ; | ai | aj | ak | al | funct | phi0  | cp    | mult |
|---|----|----|----|----|-------|-------|-------|------|
|   | 1  | 4  | 5  | 6  | 1     | gd_29 |       |      |
|   | 4  | 5  | 6  | 7  | 1     | gd_4  |       |      |
|   | 4  | 5  | 6  | 7  | 1     | gd_36 |       |      |
|   | 5  | 6  | 7  | 8  | 1     | gd_29 |       |      |
|   | 6  | 7  | 8  | 11 | 1     | gd_20 |       |      |
|   | 6  | 7  | 8  | 11 | 1     | gd_27 |       |      |
|   | 7  | 8  | 11 | 12 | 1     | gd_20 |       |      |
|   | 7  | 8  | 11 | 12 | 1     | gd_27 |       |      |
|   | 8  | 11 | 12 | 13 | 1     | gd_29 |       |      |
|   | 11 | 12 | 13 | 42 | 1     | gd_34 |       |      |
|   | 12 | 13 | 14 | 15 | 1     | gd_29 |       |      |
|   | 12 | 13 | 42 | 43 | 1     | gd_34 |       |      |
|   | 13 | 14 | 15 | 17 | 1     | gd_13 |       |      |
|   | 13 | 42 | 43 | 44 | 1     | gd_29 |       |      |
|   | 14 | 15 | 17 | 18 | 1     | gd_40 |       |      |
|   | 15 | 17 | 18 | 19 | 1     | gd_34 |       |      |
|   | 17 | 18 | 19 | 20 | 1     | gd_34 |       |      |
|   | 18 | 19 | 20 | 21 | 1     | gd_34 |       |      |
|   | 19 | 20 | 21 | 22 | 1     | gd_34 |       |      |
|   | 20 | 21 | 22 | 23 | 1     | gd_34 |       |      |
|   | 21 | 22 | 23 | 24 | 1     | gd_34 |       |      |
|   | 22 | 23 | 24 | 25 | 1     | gd_34 |       |      |
|   | 23 | 24 | 25 | 26 | 1     | gd_34 |       |      |
|   | 24 | 25 | 26 | 27 | 1     | gd_34 |       |      |
|   | 25 | 26 | 27 | 28 | 1     | gd_34 |       |      |
|   | 26 | 27 | 28 | 41 | 1     | gd_41 |       |      |
|   | 27 | 28 | 29 | 30 | 1     | 0.0   | 33.50 | 2    |
|   | 37 | 32 | 33 | 35 | 1     | 0.0   | 33.50 | 2    |
|   | 42 | 43 | 44 | 46 | 1     | gd_13 |       |      |
|   | 43 | 44 | 46 | 47 | 1     | gd_40 |       |      |
|   | 44 | 46 | 47 | 48 | 1     | gd_34 |       |      |
|   | 46 | 47 | 48 | 49 | 1     | gd_34 |       |      |
|   | 47 | 48 | 49 | 50 | 1     | gd_34 |       |      |
|   | 48 | 49 | 50 | 51 | 1     | gd_34 |       |      |
|   | 49 | 50 | 51 | 52 | 1     | gd_34 |       |      |
|   | 50 | 51 | 52 | 53 | 1     | gd_34 |       |      |
|   | 51 | 52 | 53 | 54 | 1     | gd_34 |       |      |
|   | 52 | 53 | 54 | 55 | 1     | gd_34 |       |      |
|   | 53 | 54 | 55 | 56 | 1     | gd_34 |       |      |
|   | 54 | 55 | 56 | 57 | 1     | gd_34 |       |      |
|   | 55 | 56 | 57 | 58 | 1     | gd_34 |       |      |
|   | 56 | 57 | 58 | 59 | 1     | gd_34 |       |      |

57 58 59 60 1 gd\_34

[ dihedrals ]

```
; ai    aj    ak    al funct
    13    14    42    12      2    gi_2
    15    14    16    17      2    gi_1
    44    43    45    46      2    gi_1
    28    27    41    29      2  0.00000E+00 0.16740E+03
    29    28    38    30      2  0.00000E+00 0.16740E+03
    38    29    37    40      2  0.00000E+00 0.16740E+03
    37    38    32    36      2  0.00000E+00 0.16740E+03
    32    37    33    31      2  0.00000E+00 0.16740E+03
    33    32    35    34      2  0.00000E+00 0.16740E+03
    38    40    39    36      2  0.00000E+00 0.16740E+03
    40    39    36    37      2  0.00000E+00 0.16740E+03
    39    36    37    38      2  0.00000E+00 0.16740E+03
    36    37    38    40      2  0.00000E+00 0.16740E+03
    37    38    40    39      2  0.00000E+00 0.16740E+03
    29    38    37    32      2  0.00000E+00 0.16740E+03
    38    37    32    31      2  0.00000E+00 0.16740E+03
    37    32    31    30      2  0.00000E+00 0.16740E+03
    32    31    30    29      2  0.00000E+00 0.16740E+03
    31    30    29    38      2  0.00000E+00 0.16740E+03
    30    29    38    37      2  0.00000E+00 0.16740E+03
    35    33    32    37      2  0.00000E+00 0.16740E+03
    31    32    33    34      2  0.00000E+00 0.16740E+03
```



## Topology file for C<sub>4</sub>NBD-PC (Martini 2.0 force field)

```
[moleculetype]
; molname      nrexcl
  NC04         1

[atoms]
; id type  resnr      residu    atom  cgnr  charge
  1 Q0     1    NC04  NC3     1    1.0
  2 Qa     1    NC04  PO4     2   -1.0
  3 Na     1    NC04  GL1     3    0
  4 Na     1    NC04  GL2     4    0
  5 C2     1    NC04  C1A     5    0
  6 SNda   1    NC04  NHC     4    0
  7 C1     1    NC04  C1B     7    0
  8 C1     1    NC04  C2B     8    0
  9 C1     1    NC04  C3B     9    0
 10 C1     1    NC04  C4B    10    0
 11 SP3    1    NC04  NO2    11    0
 12 SC4    1    NC04  CC1    12    0
 13 SNa    1    NC04  NON    13    0
 14 SC4    1    NC04  CC2    14    0

[bonds]
; i  j      funct      length      force.c.
  1  2      1         0.47 1250
  2  3      1         0.47 1250
  3  4      1         0.37 1250
  3  5      1         0.47 1250
  5  6      1         0.34 1250
  4  7      1         0.47 1250
  7  8      1         0.47 1250
  8  9      1         0.47 1250
  9 10      1         0.47 1250

[constraints]
; i  j      funct      length
 11 12      1         0.317
 11 14      1         0.311
 12 13      1         0.153
  6 12      1         0.251
  6 14      1         0.247

[angles]
; i  j  k      funct      angle      force.c.
  2  3  4      2         120.0     25.0
  2  3  5      2         180.0     25.0
  3  5  6      2         180.0     25.0
  4  7  8      2         180.0     25.0
  7  8  9      2         180.0     25.0
  8  9 10      2         180.0     25.0
 11 12 13      2         116.0    1800.0
 11 14  6      2         130.0    2400.0
 12  6 14      2           58.0    6000.0
```

|    |    |   |   |       |        |
|----|----|---|---|-------|--------|
| 13 | 12 | 6 | 2 | 117.5 | 1900.0 |
| 14 | 6  | 5 | 2 | 135.0 | 25.0   |

[dihedrals]

| ; | i  | j  | k  | l  | funct | angle | force.c. |
|---|----|----|----|----|-------|-------|----------|
|   | 11 | 12 | 6  | 14 | 2     | 0.0   | 25.0     |
|   | 12 | 6  | 14 | 11 | 2     | 0.0   | 25.0     |
|   | 6  | 14 | 11 | 12 | 2     | 0.0   | 25.0     |
|   | 14 | 11 | 12 | 6  | 2     | 0.0   | 25.0     |
|   | 12 | 11 | 13 | 6  | 2     | 0.0   | 200.0    |

[exclusions]

|    |    |    |    |    |
|----|----|----|----|----|
| 11 | 12 | 13 | 6  | 14 |
| 12 | 13 | 6  | 14 |    |
| 13 | 6  | 14 |    |    |
| 6  | 14 |    |    |    |
| 12 | 14 |    |    |    |

## Topology file for C<sub>12</sub>NBD-PC (Martini 2.0 force field)

```
[moleculetype]
; molname      nrexcl
  NC12         1

[atoms]
; id type  resnr      residu    atom  cgnr  charge
  1 Q0     1    NC12  NC3     1    1.0
  2 Qa     1    NC12  PO4     2   -1.0
  3 Na     1    NC12  GL1     3    0
  4 Na     1    NC12  GL2     4    0
  5 C1     1    NC12  C1A     5    0
  6 C1     1    NC12  C2A     6    0
  7 C2     1    NC12  C3A     7    0
  8 SNda   1    NC12  NHC     8    0
  9 C1     1    NC12  C1B     9    0
 10 C1     1    NC12  C2B    10    0
 11 C1     1    NC12  C3B    11    0
 12 C1     1    NC12  C4B    12    0
 13 SP3    1    NC12  NO2    13    0
 14 SC4    1    NC12  CC1    14    0
 15 SNa    1    NC12  NON    15    0
 16 SC4    1    NC12  CC2    16    0

[bonds]
; i  j      funct      length      force.c.
  1  2      1         0.47 1250
  2  3      1         0.47 1250
  3  4      1         0.37 1250
  3  5      1         0.47 1250
  5  6      1         0.47 1250
  6  7      1         0.47 1250
  7  8      1         0.34 1250
  4  9      1         0.47 1250
  9 10      1         0.47 1250
 10 11      1         0.47 1250
 11 12      1         0.47 1250

[constraints]
; i  j      funct      length
 13 14      1         0.317
 13 16      1         0.311
 14 15      1         0.153
  8 14      1         0.251
  8 16      1         0.247

[angles]
; i  j  k      funct      angle      force.c.
  2  3  4      2         120.0     25.0
  2  3  5      2         180.0     25.0
  3  5  6      2         180.0     25.0
  5  6  7      2         180.0     25.0
  6  7  8      2         180.0     25.0
```

|    |    |    |   |       |        |
|----|----|----|---|-------|--------|
| 4  | 9  | 10 | 2 | 180.0 | 25.0   |
| 9  | 10 | 11 | 2 | 180.0 | 25.0   |
| 10 | 11 | 12 | 2 | 180.0 | 25.0   |
| 13 | 14 | 15 | 2 | 116.0 | 1800.0 |
| 13 | 16 | 8  | 2 | 130.0 | 2400.0 |
| 14 | 8  | 16 | 2 | 58.0  | 6000.0 |
| 15 | 14 | 8  | 2 | 117.5 | 1900.0 |
| 16 | 8  | 7  | 2 | 135.0 | 25.0   |

[dihedrals]

| ; | i  | j  | k  | l  | funct | angle | force.c. |
|---|----|----|----|----|-------|-------|----------|
|   | 13 | 14 | 8  | 16 | 2     | 0.0   | 25.0     |
|   | 14 | 8  | 16 | 13 | 2     | 0.0   | 25.0     |
|   | 8  | 16 | 13 | 14 | 2     | 0.0   | 25.0     |
|   | 16 | 13 | 14 | 8  | 2     | 0.0   | 25.0     |
|   | 14 | 13 | 15 | 8  | 2     | 0.0   | 200.0    |

[exclusions]

|    |    |    |    |    |
|----|----|----|----|----|
| 13 | 14 | 15 | 8  | 16 |
| 14 | 15 | 8  | 16 |    |
| 15 | 8  | 16 |    |    |
| 8  | 16 |    |    |    |
| 14 | 16 |    |    |    |

## Description of the Martini parameterization of the NBD fluorophore

The number and distribution of the Martini beads, i.e. mapping, was chosen in order to preserve the geometrical structure of the NBD, which could be done with a five bead configuration, as shown in Fig. S1. Then, the attributed bonded and non-bonded (i.e. bead types) parameters, defined based on the mapping process, were tested and validated comparing the coarse grained (CG) model to atomistic data for the probes composed by the NBD group attached to an alkyl chains of different sizes, NBD-C<sub>4</sub> and NBD-C<sub>8</sub>.<sup>1, 2</sup> The bonded parameters were validated comparing 10 ns simulations of the molecule NBD-C<sub>8</sub> in water at both resolution levels. As shown in Fig. S2 to S4, the bond, angle and dihedral distribution of the CG model matched very well the atomistic data. Then, the non-bonded parameters were validated against our previous reported potential of mean force (PMF) profiles for the NBD-C<sub>n</sub> homologous series,<sup>2</sup> in this case for both NBD-C<sub>4</sub> and NBD-C<sub>8</sub>. The sampling at each umbrella window was done during 200 ns, discarding the first 50 ns as equilibration time. A time step of 20 fs was used in all simulations. As shown in Fig. S5, the PMFs obtained with the CG parameterizations are similar to those obtained at atomistic level, validating the type of Martini beads used.

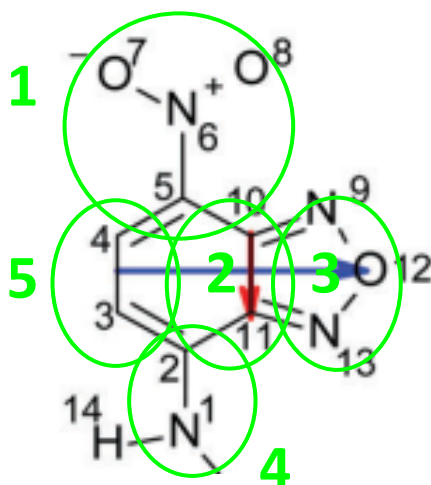

Fig. S1 – Coarse grained mapping of the NBD fluorophore for the Martini parameterization regarding its atomistic structure. The groups of atoms (5, 6, 7, 8), (10, 11), (9, 12, 13), (1,2) and (3, 4) were defined as SP3, SC4, SNa, SNda, and SC4 Martini beads, respectively. Bead numbers are indicated in green.

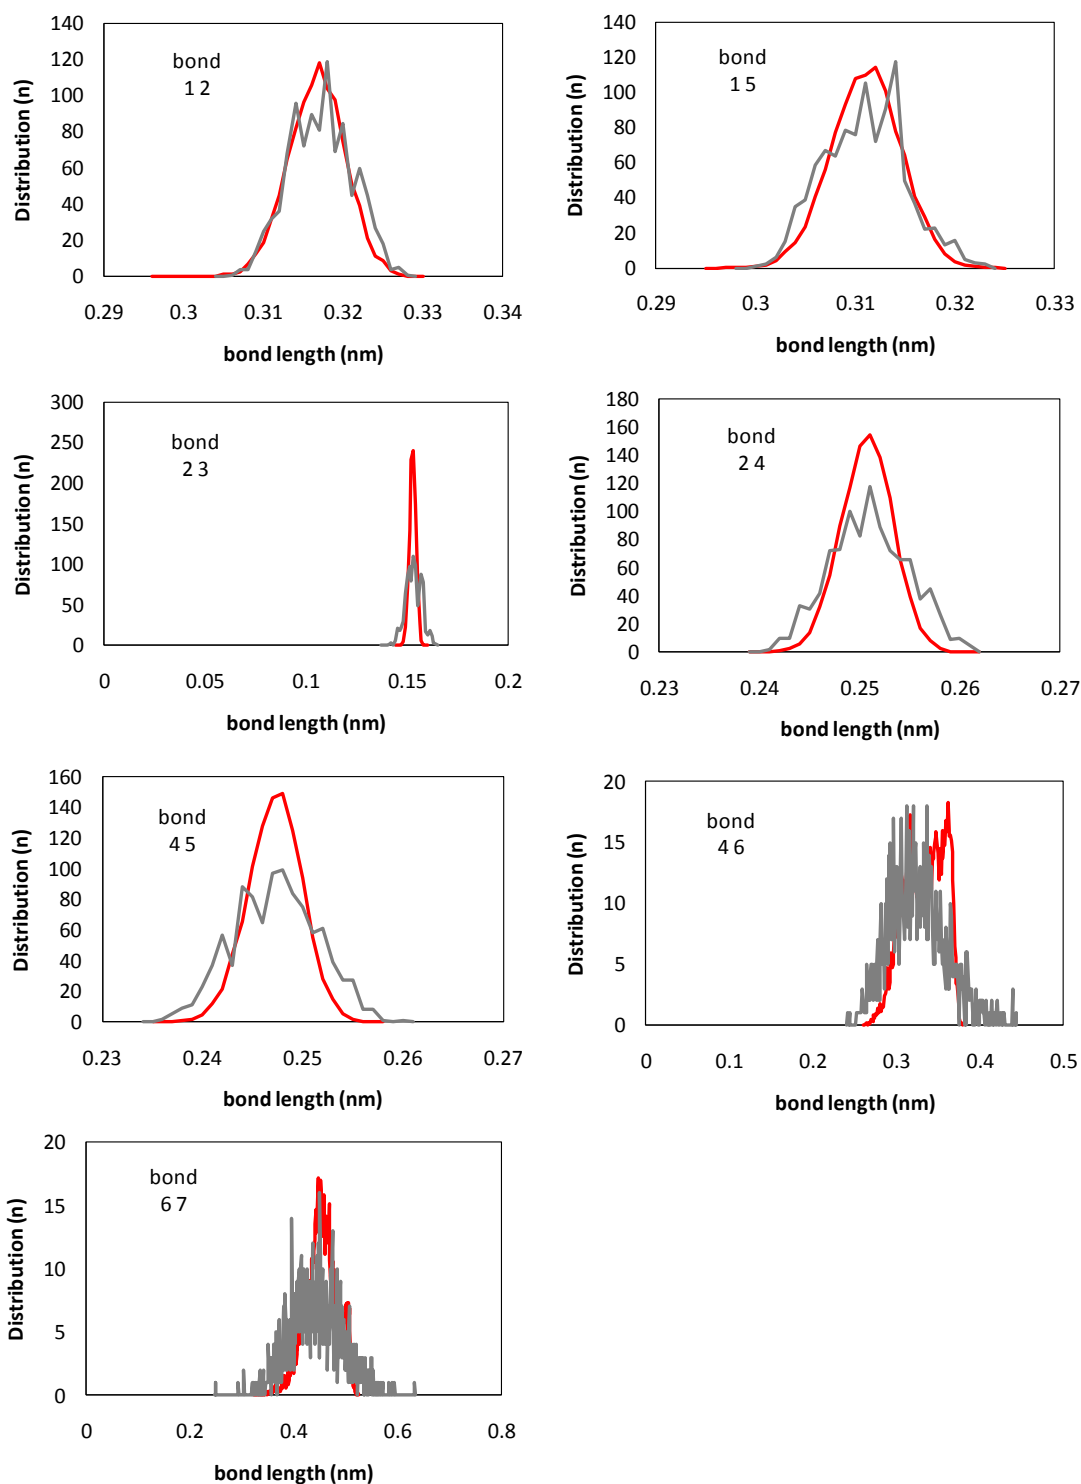

Fig. S2 – Comparison of bond length distributions for the martini (gray) and mapped G53A6FF (red) parameterization of NBD-C<sub>8</sub> as used in reference <sup>1</sup>. For bond identification, please refer to bead number in Figure S1. Bonds (1-2), (1-5), (2-3), (2-4) and (4-5) were set to constraints and bonds (4-6) and (6-7) were set as regular bonds.

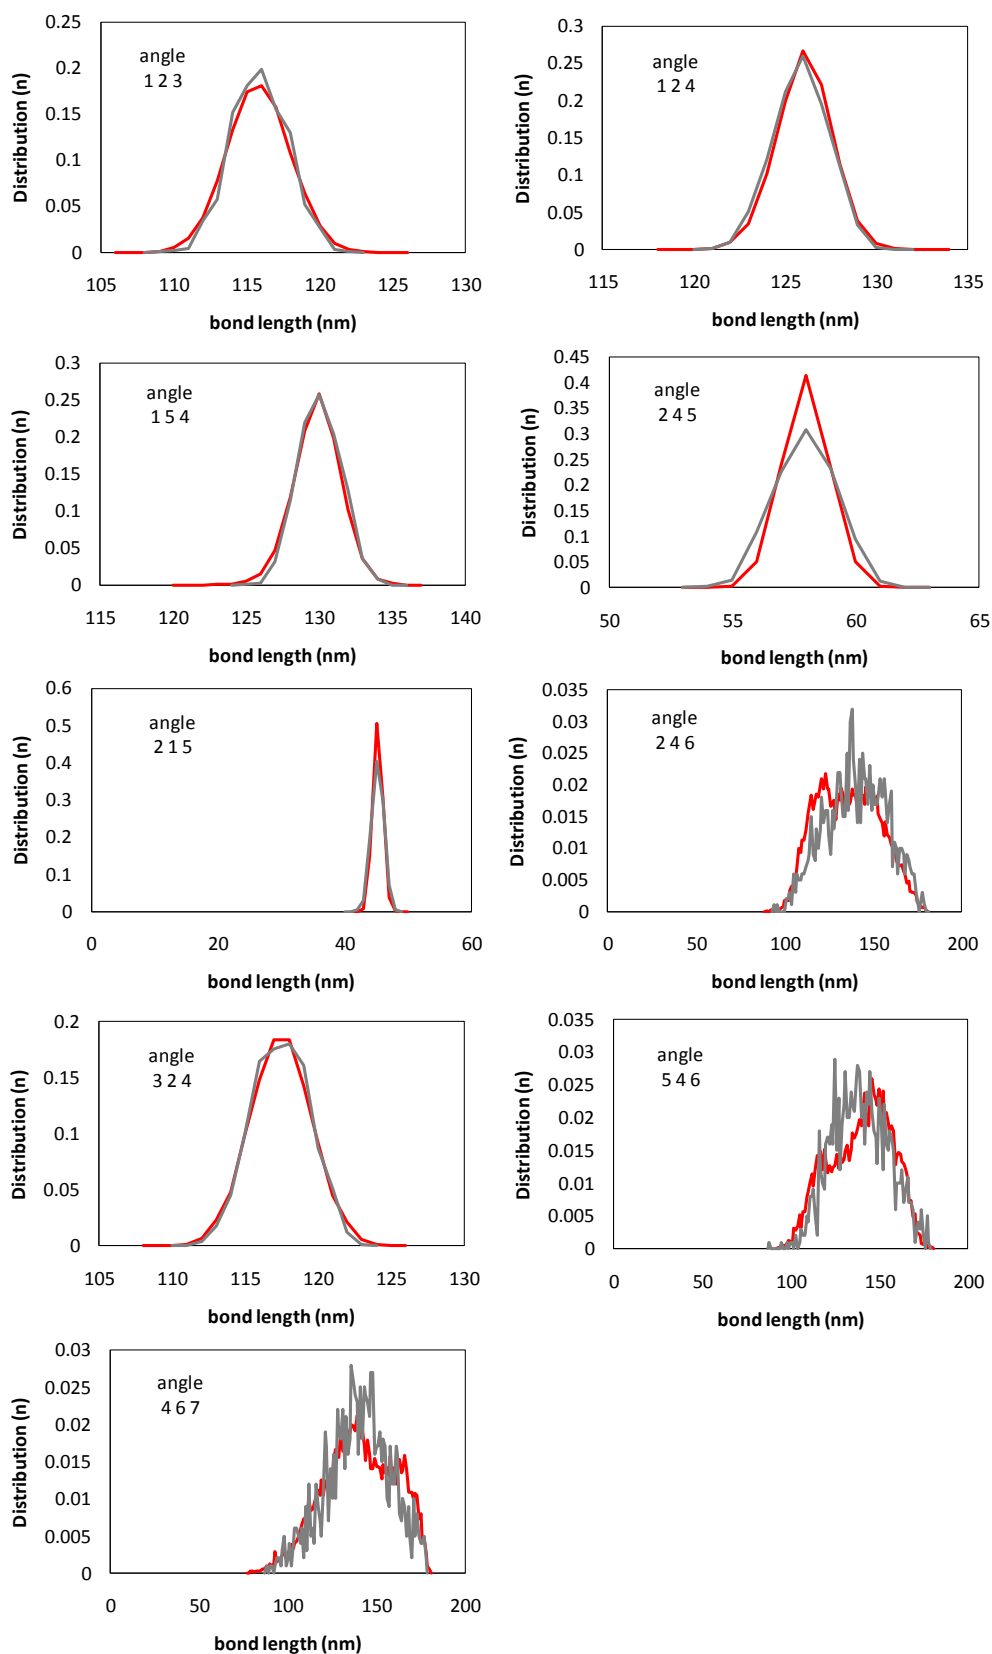

Fig. S3 – Comparison of angle distributions for the martini (gray) and mapped G53A6FF (red) parameterization of NBD-C<sub>8</sub> as used in reference <sup>1</sup>. For angle identification, please refer to bead number in Figure S1. Note that angles (1-2-4), (2-1-5) and (2-4-6) are actually not defined in the parametrization file.

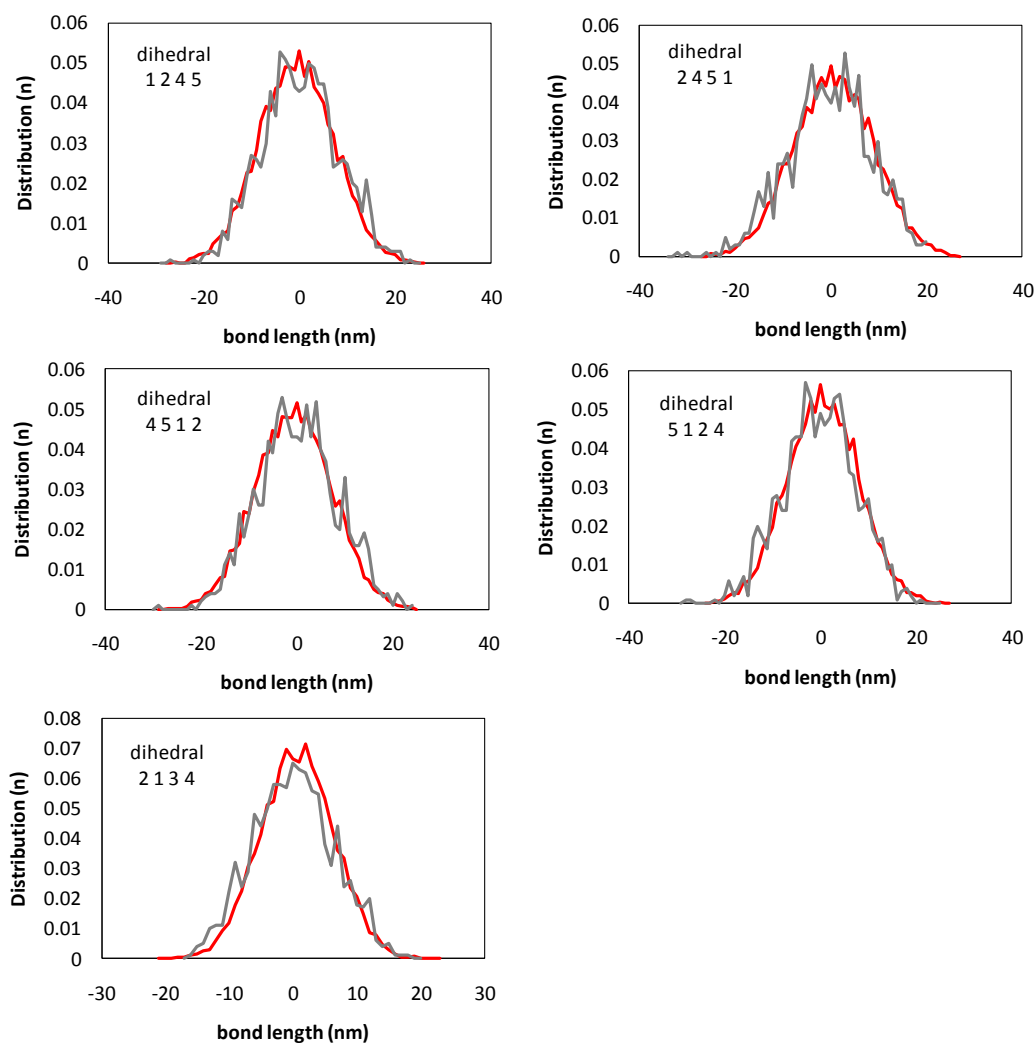

Fig. S4 – Comparison of bond dihedral distributions for the martini (gray) and mapped G53A6FF (red) parameterization of NBD-C<sub>8</sub> as used in reference <sup>1</sup>. For dihedral identification, please refer to bead number in Figure S1.

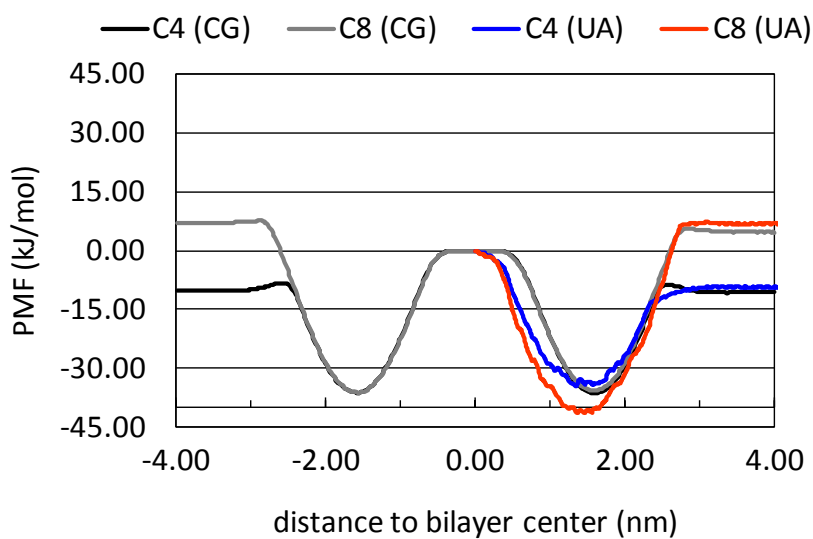

Fig. S5 – Potential of Mean Force (PMF) profiles for the interaction of NBD-C<sub>4</sub> and NBD-C<sub>8</sub> with a POPC bilayer at atomistic <sup>2</sup> and coarse grained (this work) level.



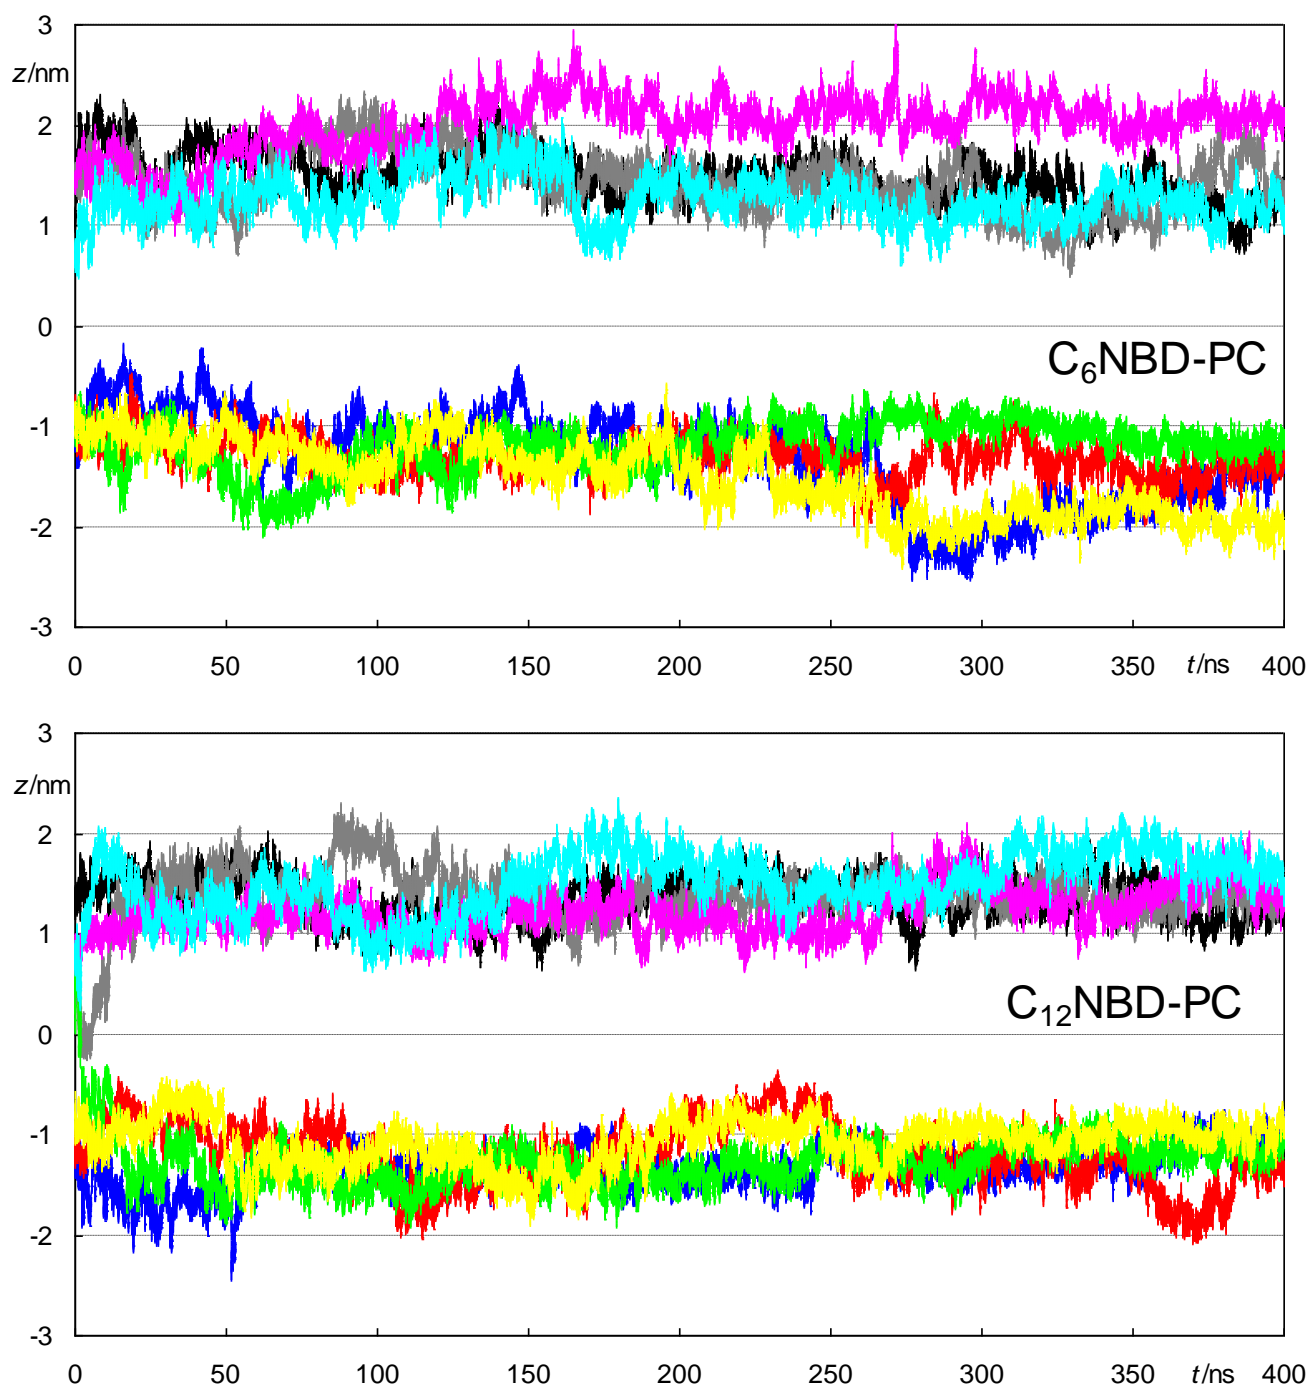

Fig. S6 - Time evolution of the center of mass of the fluorophores of the eight NBD-PC molecules considered in the atomistic simulations, each of them depicted in a distinct color. Top:  $C_6$ NBD-PC; bottom:  $C_{12}$ NBD-PC.

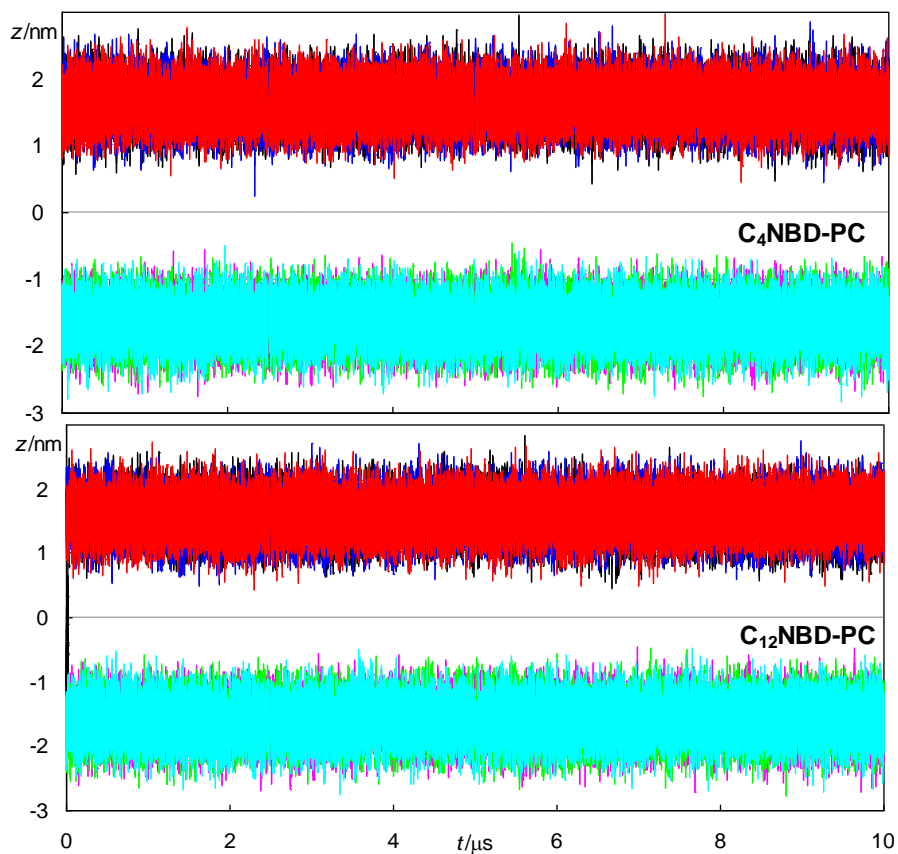

Fig. S7 - Time evolution of the transverse location  $z$  of the center of mass of the NBD fluorophore of each individual probe (black, blue and red for the top leaflet molecules; pink, green and cyan for the bottom leaflet molecules) in the CG simulations of C<sub>4</sub>NBD-PC (top) and C<sub>12</sub>NBD-PC (bottom).

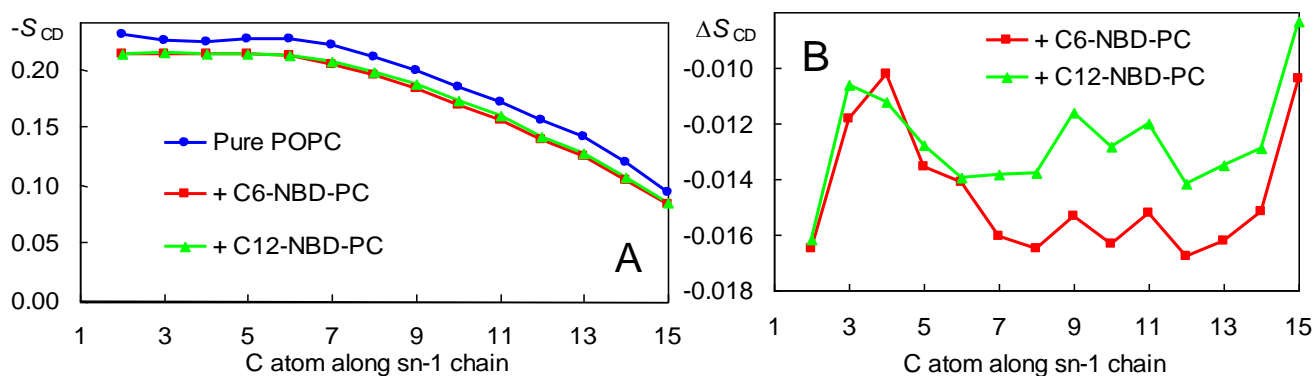

Fig. S8 - (A) Deuterium order parameters ( $S_{CD}$ ) for the POPC *sn*-1 atoms in the absence and in the presence of C<sub>6</sub>- or C<sub>12</sub>NBD-PC, calculated from the atomistic simulations. (B) Difference order parameter plots ( $\Delta S_{CD}$ ), obtained by subtraction of the pure POPC order parameter profile from those calculated in the presence of C<sub>6</sub>- or C<sub>12</sub>NBD-PC.

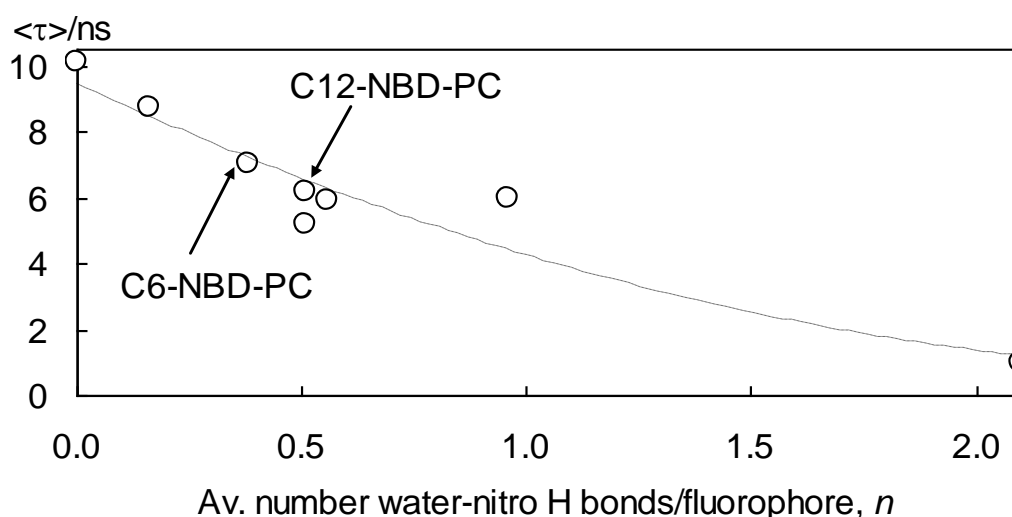

Fig. S9 - Intensity-averaged lifetimes  $\langle \tau \rangle$  obtained for different NBD probes in fluid PC bilayers,<sup>3-7</sup> represented as a function of their average number of water-NBD NO<sub>2</sub> hydrogen bonds determined by MD simulation.<sup>3, 8-10</sup> The point (0, 10.1 ns) corresponds to polar aprotic solvents such as acetone, tetrahydrofuran or dioxane<sup>11</sup>. For water,  $\langle \tau \rangle = 1.0$  ns,<sup>11</sup> and  $n = 2.1$  was calculated from a simulation of NBD-C<sub>4</sub> in water. The points corresponding to the probes addressed in this work are highlighted with arrows. For more details, see Table S2.

Table S2 - MD simulation data on orientation and H-bonding, and experimental values of fluorescence lifetime for different NBD lipid probes. Unless stated otherwise, the data were obtained at room temperature/298 K.

| Probe                      | Orientation and H-bonding from MD |                                                                  |        |               | Fluorescence lifetime               |                                                |                |
|----------------------------|-----------------------------------|------------------------------------------------------------------|--------|---------------|-------------------------------------|------------------------------------------------|----------------|
|                            | Short axis tilt/ °                | Average number of water-NBD NO <sub>2</sub> H-bonds/ fluorophore | System | Ref.          | Intensity-averaged $\tau$ /ns       | System                                         | Ref.           |
| NBD-C <sub>n</sub> (n ≥ 8) | 130                               | 0.51                                                             | POPC   | <sup>8</sup>  | 5.2                                 | POPC                                           | <sup>4</sup>   |
| 22-NBD-Chol                | 130                               | 0.96                                                             | POPC   | <sup>9</sup>  | 6.0 <sup>5</sup> , 6.2 <sup>6</sup> | DMPC, 40 °C <sup>5</sup> or 37 °C <sup>6</sup> | <sup>5,6</sup> |
| C <sub>12</sub> -NBD-PC    | 130                               | 0.51                                                             | POPC   | This work     | 6.2                                 | POPC                                           | This work      |
| NBD-PSH                    | 100                               | 0.56                                                             | DOPC   | <sup>3</sup>  | 5.9                                 | DOPC                                           | <sup>3</sup>   |
| C <sub>6</sub> -NBD-PC     | 100                               | 0.38                                                             | POPC   | This work     | 7.0                                 | POPC                                           | This work      |
| N-NBD-PE                   | 70                                | 0.16                                                             | POPC   | <sup>10</sup> | 8.7                                 | Egg-PC                                         | <sup>7</sup>   |

NBD-C<sub>n</sub>: *N*-[(7-nitro-2-1,3-benzoxadiazol-4-yl)amino]alkyl; 22-NBD-Chol: 22-(*N*-(7-nitrobenz-2-1,3-benzoxadiazol-4-yl)amino)-23,24-bisnor-5-cholen-3 $\beta$ -ol; C<sub>12</sub>-NBD-PC: 1-palmitoyl-2-[12-[(7-nitro-2-1,3-benzoxadiazol-4-yl)amino]dodecanoyl]-*sn*-glycero-3-phosphocholine; NBD-PSH: 1,2-dioleoyl-*sn*-glycero-3-phospho-L-serine-*N*-(7-nitro-2-1,3-benzoxadiazol-4-yl); C<sub>6</sub>-NBD-PC: 1-palmitoyl-2-[6-[(7-nitro-2-1,3-benzoxadiazol-4-yl)amino]hexanoyl]-*sn*-glycero-3-phosphocholine; *N*-NBD-PE: 1,2-dipalmitoyl-*sn*-glycero-3-phosphoethanolamine-*N*-(7-nitro-2-1,3-benzoxadiazol-4-yl); POPC: 1-palmitoyl-2-oleoyl-*sn*-glycero-3-phosphocholine; DOPC: 1,2-dioleoyl-*sn*-glycero-3-phosphocholine; DMPC: 1,2-dimyristoyl-*sn*-glycero-3-phosphocholine; Egg-PC: L- $\alpha$ -phosphatidylcholine from chicken egg.

## References

1. H. A. L. Filipe, D. Bowman, T. Palmeira, R. M. S. Cardoso, L. M. S. Loura and M. J. Moreno, *Phys. Chem. Chem. Phys.*, 2015, **17**, 27534-27547.
2. H. A. L. Filipe, M. J. Moreno, T. Róg, I. Vattulainen and L. M. S. Loura, *J. Phys. Chem. B*, 2014, **118**, 3572-3581.
3. M. Amaro, H. A. L. Filipe, J. P. Prates Ramalho, M. Hof and L. M. S. Loura, *Phys. Chem. Chem. Phys.*, 2016, **18**, 7042-7054.
4. R. M. S. Cardoso, H. A. L. Filipe, F. Gomes, N. D. Moreira, W. L. C. Vaz and M. J. Moreno, *J. Phys. Chem. B*, 2010, **114**, 16337-16346.
5. L. s. M. S. Loura, A. Fedorov and M. Prieto, *Biochim. Biophys. Acta, Biomembr.*, 2001, **1511**, 236-243.
6. P. Ostašov, J. Sýkora, J. Brejchová, A. Olžýňska, M. Hof and P. Svoboda, *Chem. Phys. Lipids*, 2013, **167-168**, 62-69.
7. R. S. Brown, J. D. Brennan and U. J. Krull, *J. Chem. Phys.*, 1994, **100**, 6019-6027.
8. H. A. L. Filipe, M. J. Moreno and L. M. S. Loura, *J. Phys. Chem. B*, 2011, **115**, 10109-10119.
9. J. R. Robalo, J. P. P. Ramalho and L. M. S. Loura, *J. Phys. Chem. B*, 2013, **117**, 13731-13742.
10. H. A. L. Filipe, L. S. Santos, J. P. Prates Ramalho, M. J. Moreno and L. M. S. Loura, *Phys. Chem. Chem. Phys.*, 2015, **17**, 20066-20079.
11. S. Fery-Forgues, J.-P. Fayet and A. Lopez, *J. Photochem. Photobiol., A*, 1993, **70**, 229-243.
